# Supplementary material
Source: Research Square preprint supplement (doi:10.21203/rs.3.rs-9810090/v1)
Supplement: Supplementary file 1 [file 69673c1f3b9ca49967a33e99.docx]

***miR-503-5p* functions downstream of the MAPK–CREB axis to promote tumor chemosensitivity by suppressing CHK1 expression**

Bohan Qi1#, Youjie Yin1#, Zhian Rao1, Mengdie Yang2, Chunyu Du1, Xiangzhi Li1, Hansong Deng1*

1, Department of gastroenterology, Yangzhi Rehabilitation Hospital, Sunshine Rehabilitation Center, Frontier Science Center for Stem Cell Research, School of Life Sciences and Technology, Tongji University, Shanghai 20092, China.

2, School of Nano-Tech and Nano-Bionics, University of Science and Technology of China, Hefei, Anhui, 230026, China. CAS Key Laboratory of Nano-Bio Interface, Suzhou Institute of Nano-Tech and Nano-Bionics, Chinese Academy of Sciences, Suzhou, Jiangsu, 215123, China.

Keywords: Chk1, CREB, miR-503-5p**,** *Drosophila*, mice

Classification: Genetics, Chemosensitivity, pharmacology, DNA damage response (DDR)

#: These authors contributed equally to this work.

*: [hdeng@tongji.edu.cn](mailto:hdeng@tongji.edu.cn)

This supplemental file contains 5 figures

**Figure S1.** Related to **Fig.1**, **CREB is activated by DNA damage in both *Drosophila* and mammalian cells.**

**
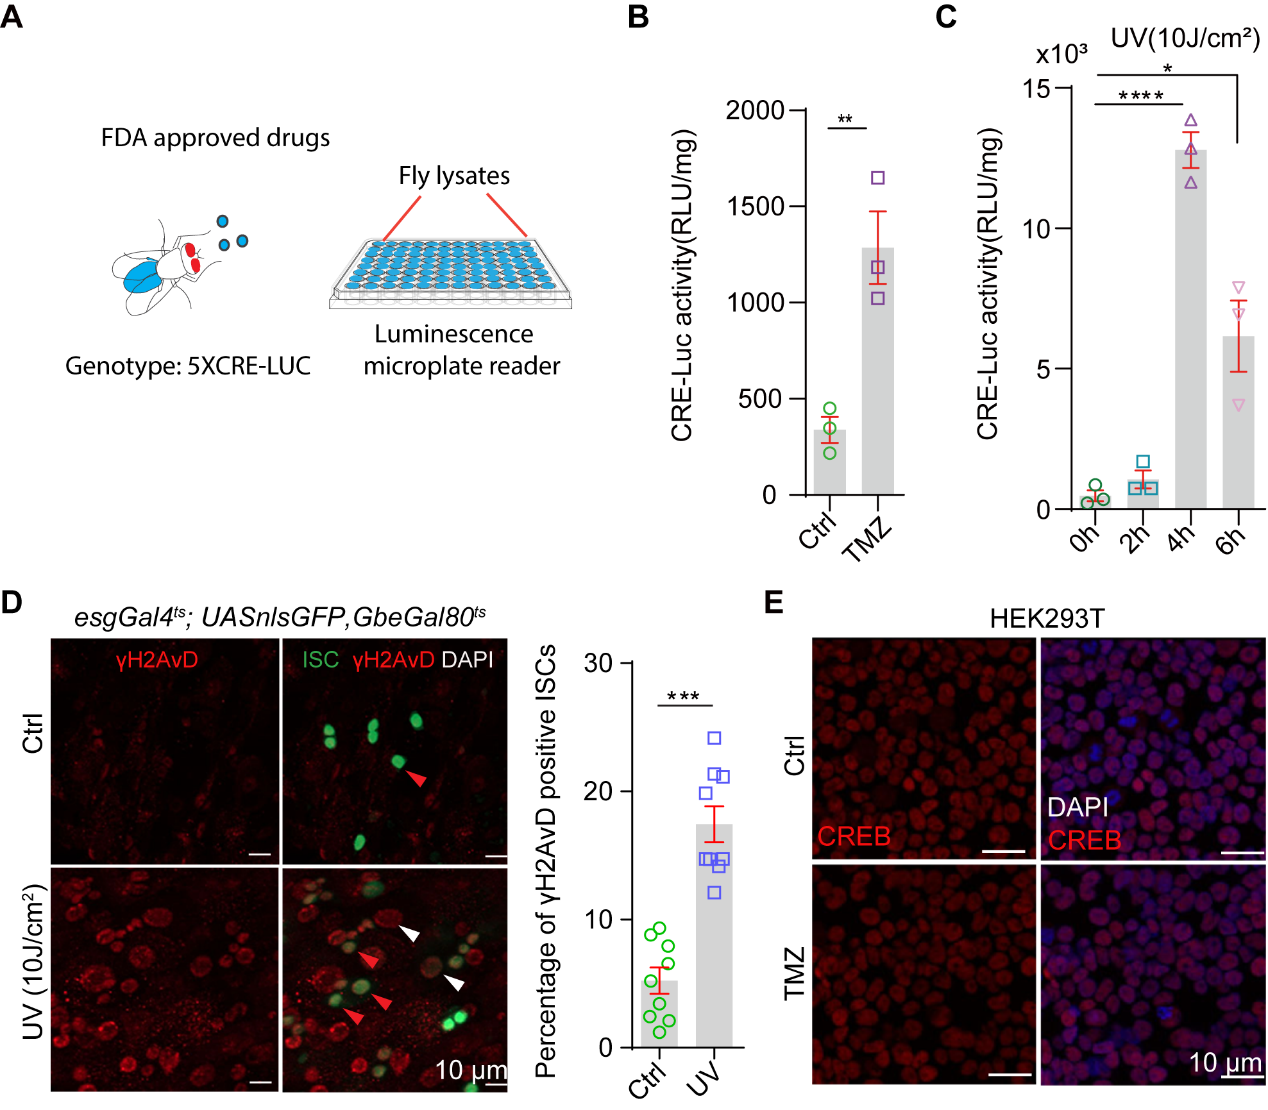
**

**A**, Schematic of the CREB agonist screen using an FDA-approved compound library. Transgenic flies carrying a 5xCRE-Luc reporter were fed with individual compounds from an FDA-approved library, delivered in liquid food. Luciferase activity was measured from fly lysates after 24 hours to identify compounds that activate CREB-mediated transcription.

**B,** Luciferase reporter assay for CREB activity in fly lysates after temozolomide (TMZ) treatment.

**C,** Time-dependent CREB activity following UV exposure (10 J/cm², 30 min).

**D**, DNA damage in ISCs and ECs was examined by γH2AvD immunostaining 4 hours after UV irradiation (10J/cm², 30min). Red and white arrowheads denote ISCs and ECs, respectively.

**E**, CREB level in HEK293T cells was examined by immunostaining after TMZ treatment (1mg/ml, 24h). For **B-D**, mean ±SEM are shown. t-Test for **B and D**, One-way ANOVA for **C**. For all panels, *: p<0.05, **：p<0.01, ***: p<0.001，****: p<0.0001. Genotypes for **B-C,** *w1118* and for **D**, *esgGal4ts; UAS::nlsGFP, GbeGal80ts*. Scale bars: 10μm for **D-E**.

**Figure S2.** Related to **Figure 2, CREB involves in DNA damage response.**

**
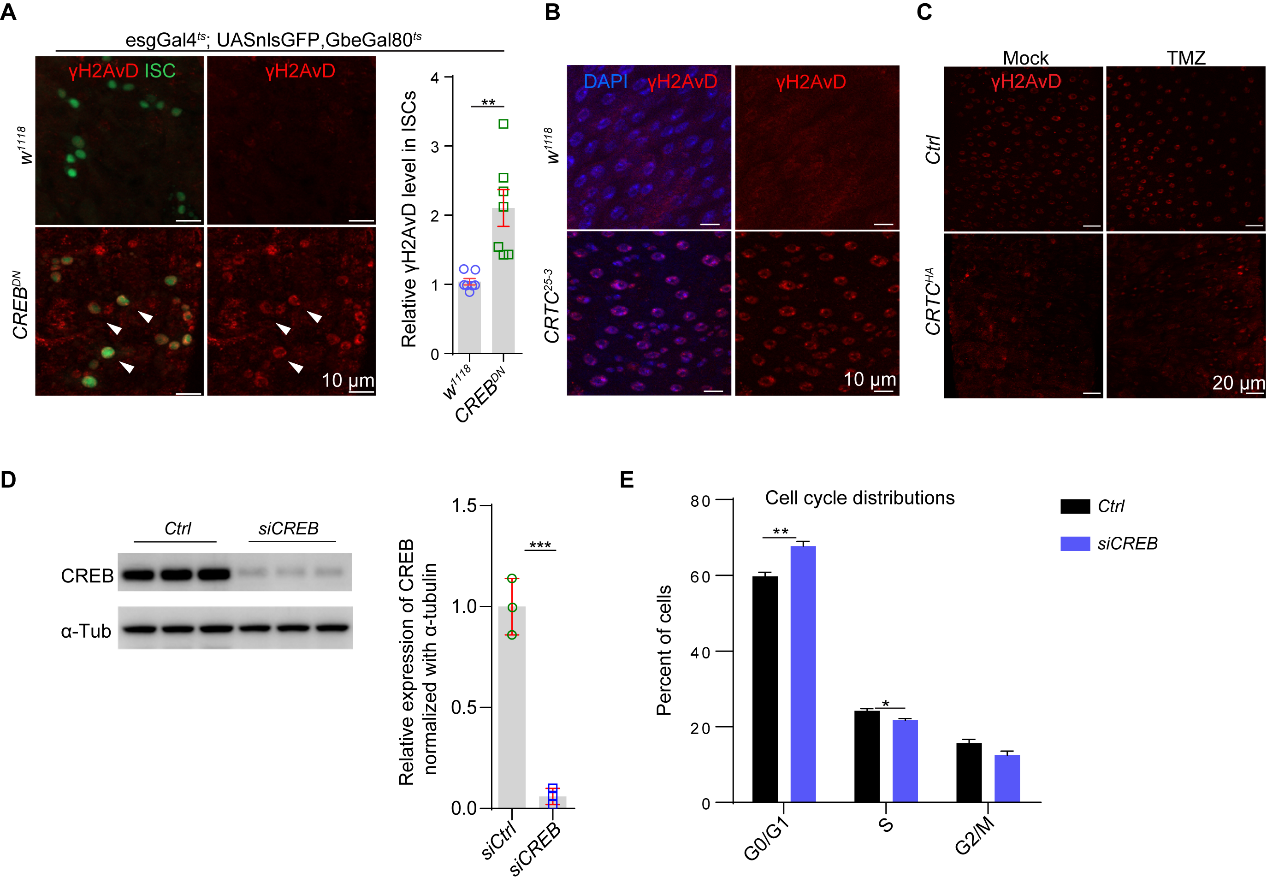
**

**A**, γH2AvD positive ISCs in guts were quantified with indicated genotypes. Representative images shown on the left, and quantification on the right. Arrowheads mark representative ISCs.

**B**, related to Fig.**2B**, representative images are shown. DAPI staining marks nuclei (blue), while γH2AvD labels sites of DNA damage (red).

**C**, related to Fig.**2C**, representative images are shown.*CRTC* overexpression attenuates TMZ-induced DNA damage in enterocytes. γH2AvD labels sites of DNA damage (red).

**D**, Validation of *siCREB* knockdown efficiency in HEK293T cells. Total CREB levels were assessed by western blot. Representative blots (left) and quantification (right) are shown. α-Tubulin served as a loading control.

**E**, Cell cycle distribution was assessed by FACS in HEK293T cells after *siCREB* knockdown. For all panels, mean ±SEM are shown. t-Test for statistical analysis. *: p<0.05, **：p<0.01, ***: p<0.001. Scale bars: 10μm for **A-B,** and 20μm for **C**.

**Figure S3.** Related to **Figure 3. p38 is both necessary and sufficient for DNA damage-induced CREB activation.**

**
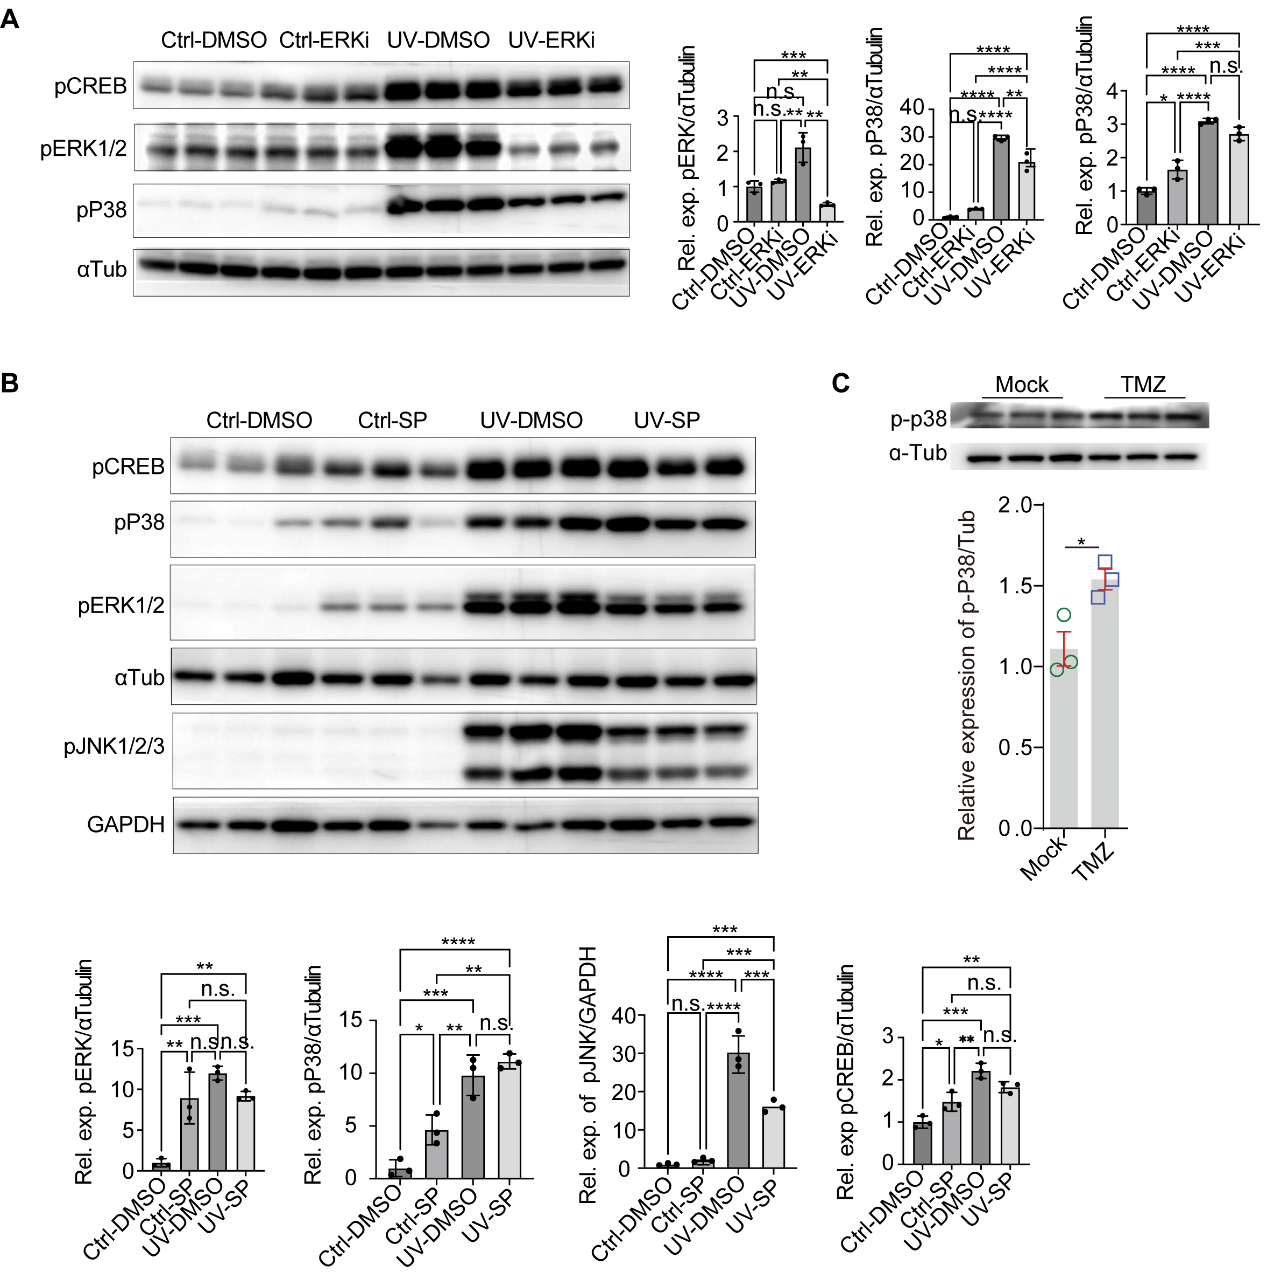
**

**A**, CREB activation upon UV exposure was assessed in cells treated with the ERK inhibitor U0126(ERKi). ERK1/2(Thr202/Tyr204) and JNKs (Thr183/Tyr185) activities were also examined, with α‑tubulin as an internal control. Quantifications are shown on the right.

**B,** CREB activation upon UV exposure was assessed in cells treated with the JNK inhibitor SP600125(SP). The phosphorylation levels of p38 (Thr180/Tyr182), JNKs, and ERKs were examined alongside p‑CREB; GAPDH was used as a loading control for JNKs, and α‑tubulin was used for ERKs, p38, and CREB. Quantifications are shown on the bottom.

**C**, p-p38 level in 293 T cells was examined by western-blot upon TMZ treatment.

For all panels, biological triplicates performed. Mean ±SEM are shown. Two-way ANOVA for **A-B**, t-Test for **C**. *: p<0.05, **：p<0.01. ***: p<0.001, ****: p<0.0001. n.s.: no significance.

**Figure S4.** Related to **Fig.4, Chk1 expression was upregulated by CREB in both *Drosophila* and HEK293T cells.**

**
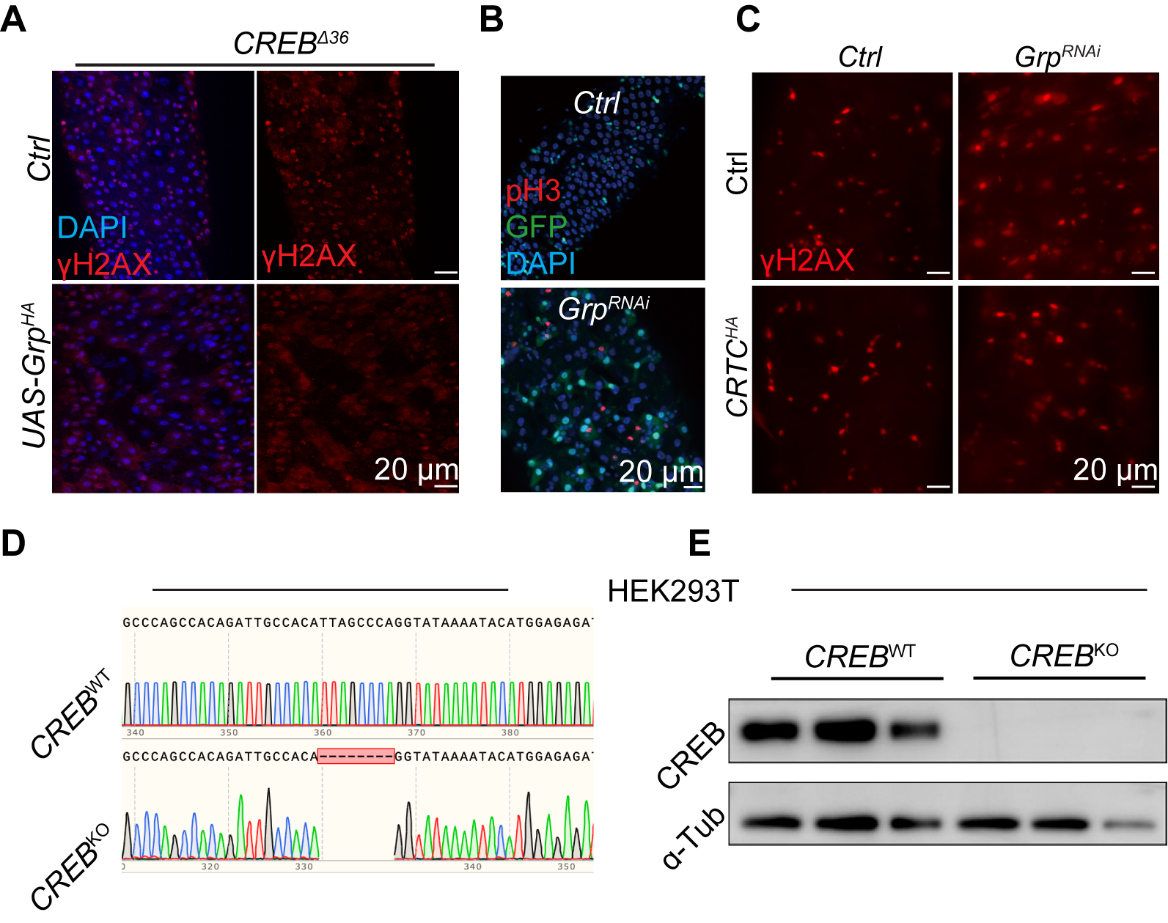
**

**A,** Representative images for γH2AX positive ECs in the guts with indicated genotypes were shown.

**C**, Proliferative ISCs in fly guts were quantified by pH3 staining. Quantifications are shown in **Fig.4D**. Nuclei are stained with DAPI (blue). ISCs express GFP (green), and pH3 marks mitotic ISCs (red)

**D,** Representative images for γH2AX positive ECs in the guts with indicated genotypes were shown. γH2AvD labels sites of DNA damage (red). Scale bars:

20μm.

**E-F**, Validation of CREB knockout in 293T cells. *CREB* knockout was confirmed by genomic sequencing (left) and by western blot analysis of CREB protein levels (right). Genotypes for **A,** *CREBΔ36; NP1Gal4ts; UASGrpHA,* for **B***, esgGal4ts; UASnlsGFP, GbeGal80ts*, *UAS-GrpRNAi*, for **C,** *NP1Gal4ts; UAS-CRTCHA*, *UAS-GrpRNAi*.

**Figure S5** Related to **Fig.7 CREB and CHK1 synergistically regulate tumor cell survival.**


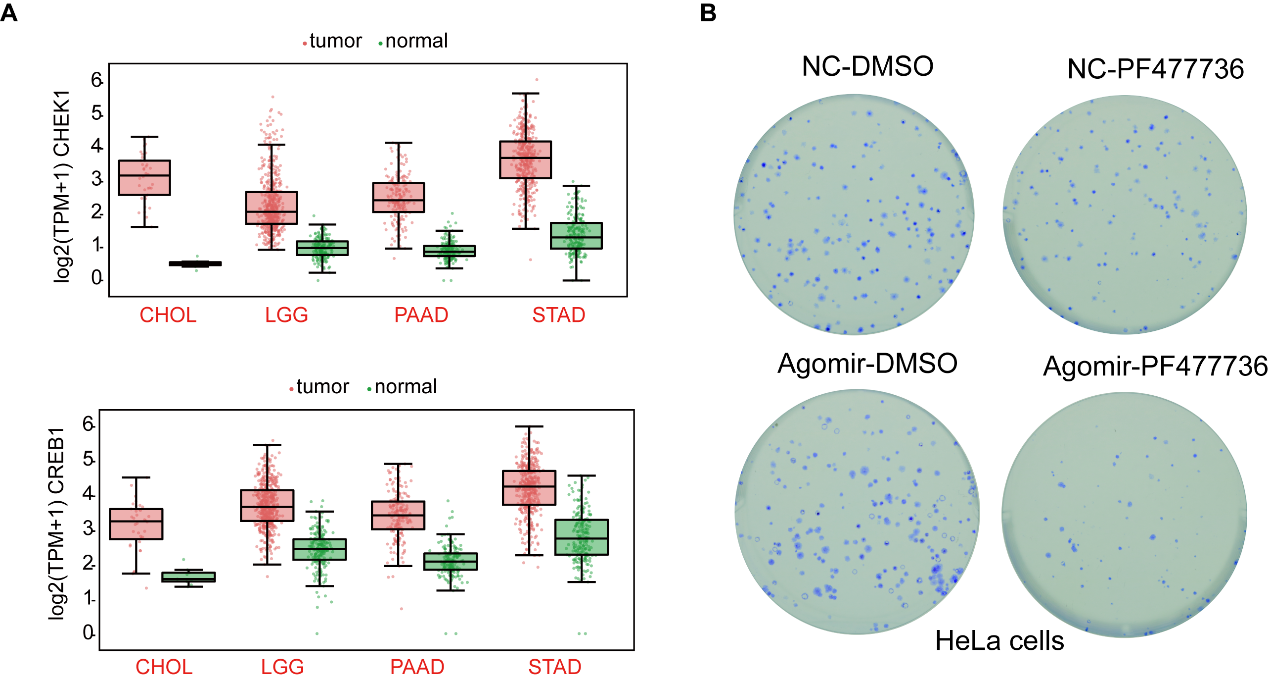


**A,** Related to **Fig. 7A**, SEPIA analysis was performed to assess CHK1 and CREB expression in the indicated cancer tissues and corresponding normal tissues from the TCGA database. Tumor tissues are shown in red, and normal tissues in green.

**B,** *miR-503-5p* potentiates PF477736 (PF)–mediated inhibition of HeLa colony formation.Representative images are shown. Biological triplicates performed.
